# Supplementary material
Source: PubMed Central journal article supplement (PMC4134409)
Supplement: NIHMS603238-supplement-109_2014_1162_MOESM1_ESM.pdf [file NIHMS603238-supplement-109_2014_1162_MOESM1_ESM.pdf]

# J Mol Med

## Supplementary Material

### Activation of the EGFR/p38 /JNK Pathway by Mitochondrial-Derived Hydrogen Peroxide Contributes To Oxygen-induced Contraction Of Ductus Arteriosus

Zhigang Hong\*, J3sus A Cabrera<sup>#</sup>, Saswati Mahapatra<sup>#</sup>, Shelby Kutty<sup>\$</sup>, E. Kenneth Weir<sup>#</sup>,

Stephen L. Archer\*

#### Supplementary figures

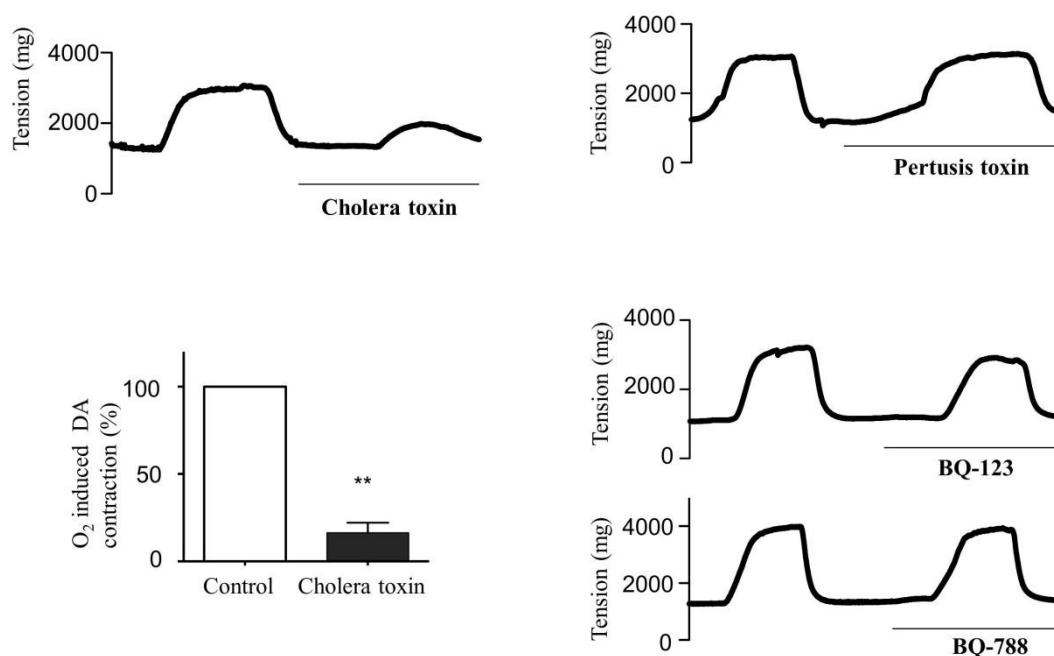

**Supplemental figure 1:** DA ring studies suggest that G proteins are involved in normoxia-induced DA contraction. Modulators of G proteins such as pertussis toxin (PTX, an inhibitor of Gi) and cholera toxin (CTX, a persistent activator of Gs) were used to detect the possibility of a role for G proteins in DA contraction.

**A:** shows that CTX (1 mg/ml) can attenuate a normoxic contraction and can subsequently diminish the normoxic response of the DA without affecting the baseline hypoxic tone. **B:** is the summary data for CTX effect on normoxia-induced DA contraction (n=10). This suggests that normoxia-induced DA contraction involves the decrease of Gs activity. **C:** Shows that 20 to 60 minutes PTX pretreatment (1 mg/ml) has no effect on normoxia-induced DA contraction. 3  $\mu$ M indomethacin and 100  $\mu$ M l-NAME were present throughout all experiments. These inhibitors of prostaglandin and nitric oxide synthesis, respectively, were used so that a contractile mechanism independent of these mediators could be studied.

**D: Representative traces:** Both BQ-123 (selective ETA receptor antagonist, 3  $\mu$ M) and BQ-788 (selective ETB receptor antagonist, 3  $\mu$ M) minimally reduced O<sub>2</sub>-induced contraction, consistent with our previous findings.

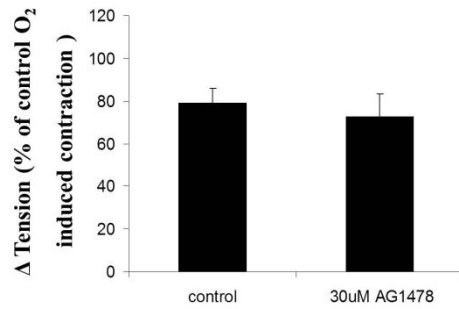

**Supplemental fig. 2:** The effect of AG1478 on KCl-induced DA contraction (n=8).

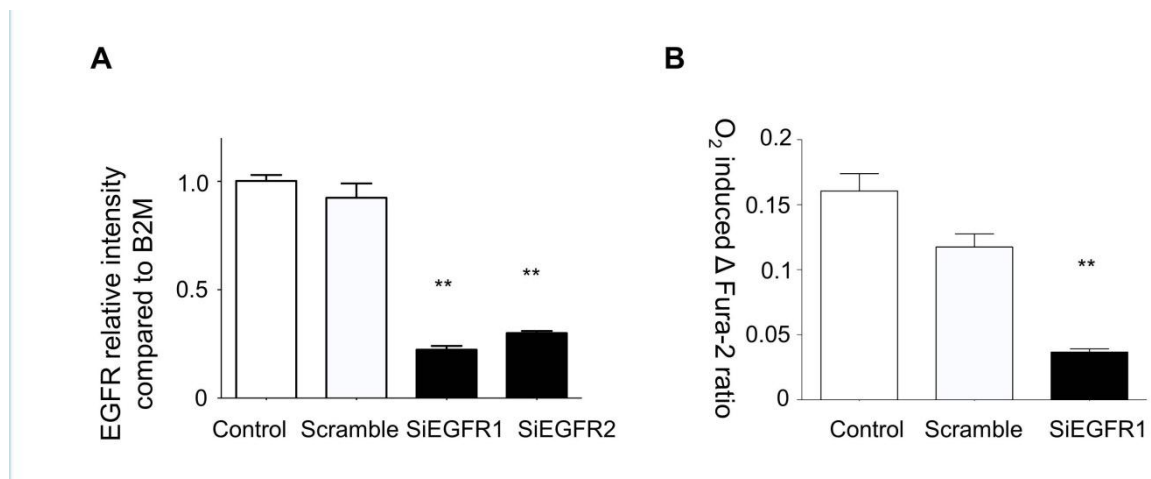

**Supplemental fig. 3:** SiEGFR attenuates the O<sub>2</sub> induced cytosolic calcium change. A: Effect of SiEGFR on EGFR mRNA in cultured human DASMCs (n=4-6). The IDT SiEGFR1 was used in the calcium imaging study. \*\* P<0.01 compared to scrambled siRNA. B: SiEGFR attenuates the O<sub>2</sub> induced cytosolic calcium change (fura-2 ratio) compared to scrambled siRNA. N=51-87, \*\* P<0.01 compared to Scrambled siRNA.

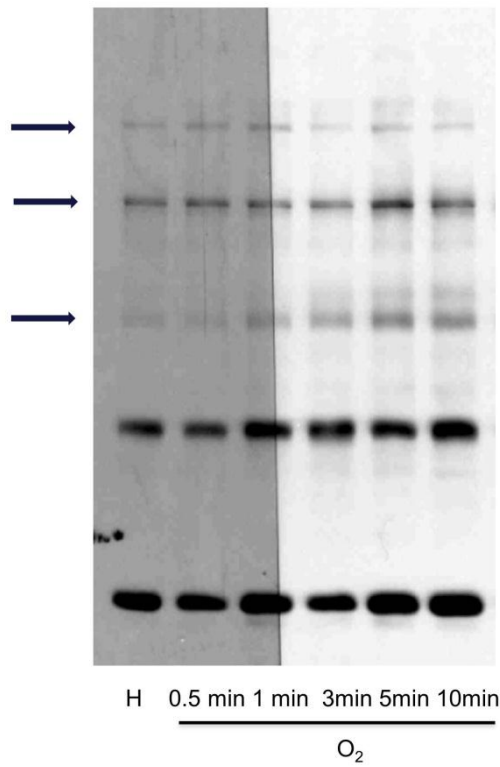

**Supplemental fig. 4:** PTP activity is decreased after 5 to 10 min O<sub>2</sub> exposure in cultured human DASMCs by a modified cysteinyl-labeling assay from Tonks NK group.

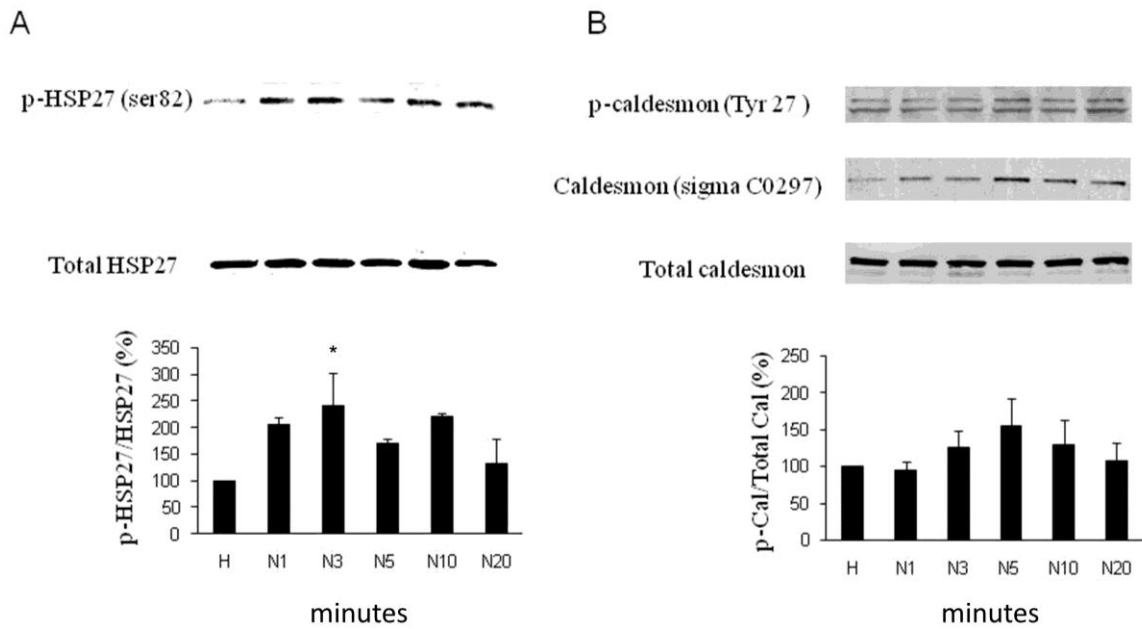

**Supplemental fig. 5:** O<sub>2</sub> caused HSP27 and caldesmon phosphorylation in human DASMCs (n=3).
